# Supplementary material
Source: PubMed Central journal article supplement (PMC7443982)

## Supplementary Material

### SIR can be induced in LEDGF/p75-knockdown cells

An additional way of demonstrating the involvement of Rev expressed by unintegrated viral cDNA in promoting SIR is to make use of LEDGF/p75-knockdown cells (Llano *et al.*, 2006). The cellular LEDGF/p75 protein has been shown to be absolutely required for efficient integration of cDNA into host chromosomal DNA (Llano *et al.*, 2006; Maertens *et al.*, 2003; Vandekerckhove *et al.*, 2006). Very little or no integration is observed in viral-infected LEDGF/p75-knockdown cells (Llano *et al.*, 2006; Vandekerckhove *et al.*, 2006), rendering these cells equivalent to normal cells infected with INm virus (see Fig. 1). The results in Supplementary Fig. S2(a) show that, as expected, the integration values obtained following infection of the LEDGF/p75-knockdown cells with wt or VSV-g-coated viruses were very low, even in the presence of infectious viruses at an m.o.i.=10. However, even with these low integration levels, SIR (reduction in integration levels) was observed which followed a pattern similar to that obtained when normal cells were infected with INm virus (see Fig. 1). However, as we have demonstrated previously (Levin *et al.*, 2010), in contrast to the wt HIV-1 cDNA, that of the  $\Delta$ Rev virus can be efficiently integrated into LEDGF/p75-knockdown cells chromosomal DNA (Levin *et al.*, 2010). Thus, an experimental system in which LEDGF/p75-knockdown cells are first infected with a wt virus and secondly with a  $\Delta$ Rev virus should be comparable to the system in which normal cells are first infected with an INm virus and secondly with a  $\Delta$ Rev virus (Fig. 2). Indeed, the SIR pattern (Supplementary Fig. S2b) obtained in the infected LEDGF/p75-knockdown cells was very similar to that shown in Fig. 2, again indicating that Rev-expressing from unintegrated DNA confers SIR. The fact that this resistance is transient and the integration level per cell is relatively high clearly indicate that the  $\Delta$ Rev virus cDNA is integrated into the LEDGF/p75-knockdown cells (see also Levin *et al.*, 2010). The timescale of the obtained SIR correlates with the presence viral cDNA and Rev protein (Supplementary Fig. S2c, d).

### References

- Levin, A., Rosenbluh, J., Hayouka, Z., Friedler, A. & Loyter, A. (2010). Integration of HIV-1 DNA is regulated by interplay between viral Rev and cellular LEDGF/p75 proteins. *Mol Med* **16**, 34–44. [Medline](#)
- Llano, M., Saenz, D. T., Meehan, A., Wongthida, P., Peretz, M., Walker, W. H., Teo, W. & Poeschla, E. M. (2006). An essential role for LEDGF/p75 in HIV integration. *Science* **314**, 461–464. [Medline](#)
- Maertens, G., Cherepanov, P., Pluymers, W., Busschots, K., De Clercq, E., Debyser, Z. & Engelborghs, Y. (2003). LEDGF/p75 is essential for nuclear and chromosomal targeting of HIV-1 integrase in human cells. *J Biol Chem* **278**, 33528–33539. [Medline](#)

Levin, A., Hayouka, Z., Friedler, A., Brack-Werner, R., Volsky, D. J. and Loyter, A. (2010). A novel role for the viral Rev protein in promoting resistance to super-infection by human immunodeficiency virus type 1. *J Gen Virol* **91**, 1503–1513.

**Vandekerckhove, L., Christ, F., Van Maele, B., De Rijck, J., Gijsbers, R., Van den Haute, C., Witvrouw, M. & Debyser, Z. (2006).** Transient and stable knockdown of the integrase cofactor LEDGF/p75 reveals its role in the replication cycle of human immunodeficiency virus. *J Virol* **80**, 1886–1896. [Medline](#)

**Supplementary Fig. S1.** Eradication of SIR – presented in Fig. 2 – by INr peptides. (a) Same as Fig. 2(a) but with the addition of 150  $\mu$ M INr peptides 2 h before the (i) single infection or (ii) 2nd-INF. (b) Co-immunoprecipitation and Western blot experiments of the experimental systems presented in (a, ii). All experimental details are as described in Methods.

**Supplementary Fig. S2.** SIR is also observed in LEDGF/p75-knockdown cells. (a) Integration events per cell were estimated in samples taken from LEDGF/p75-knockdown cells that were subjected to (i) single infection or (i) 1st-INF with a wt HIV-1 at an m.o.i.=1 and then 2nd-INF with the indicated wt viruses at an m.o.i.=1 or 10. (b) Same as in (a), but with the indicated  $\Delta$ Rev HIV-1. (b, ii) Inset, magnification of the marked section. (c) Quantitative analysis of viral cDNA in LEDGF/p75-knockdown cells at different times p.i. with wt HIV-1 at an m.o.i.=1. (d, i) Western blot analysis of samples taken from LEDGF/p75-knockdown or wt cells infected with wt HIV-1 at different times p.i. (ii) Bands were quantitatively estimated by Image Gauge V3.0 software from Fujifilm. All other experimental details are as described in Methods.

**Supplementary Fig. S3.** Integration is observed following infection of CD4 cells with VSV-g-coated but not wt HIV. Integration events per cell were estimated following (i) single infection with the indicated viruses or (ii) 1st-INF with the VSV-g-coated HIV-1 at an m.o.i.=1 and then a 2nd-INF with the indicated wt viruses at an m.o.i.=1 or 10, at different time post-1st-INF. All other experimental details are as described in Methods.

**Supplementary Fig. S4.** Eradication of SIR – presented in Fig. 4(a) – by INr peptides. (a) Same as Fig. 5(a) but with the addition of 150  $\mu$ M INr peptides 2 h before (i) single infection or (ii) 2nd-INF. (b) Co-immunoprecipitation and Western blot experiments with the systems presented in (a, ii). All experimental details are as described in Methods.

**Supplementary Fig. S5.** Eradication of SIR – presented in Fig. 4(b) – by INr peptides. (a) Same as Fig. 5b, but with the addition of 150  $\mu$ M INr peptides 2 h before the (i) single infection or (ii) 2nd-INF. (b) Co-immunoprecipitation and Western blot experiments of the experimental systems presented in (a, ii). All experimental details are as described in Methods.



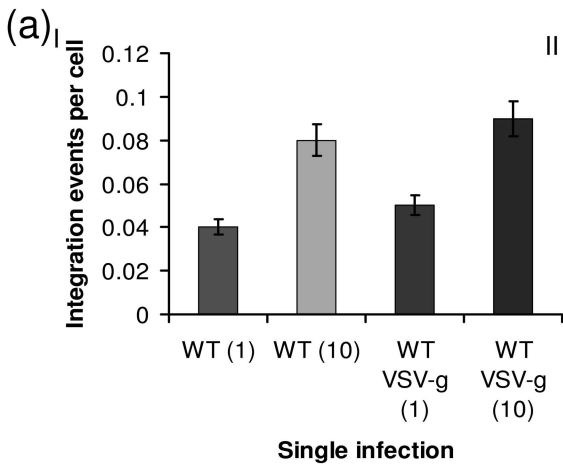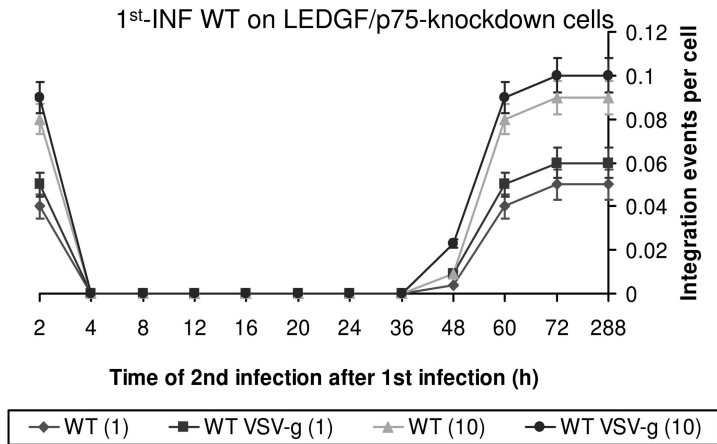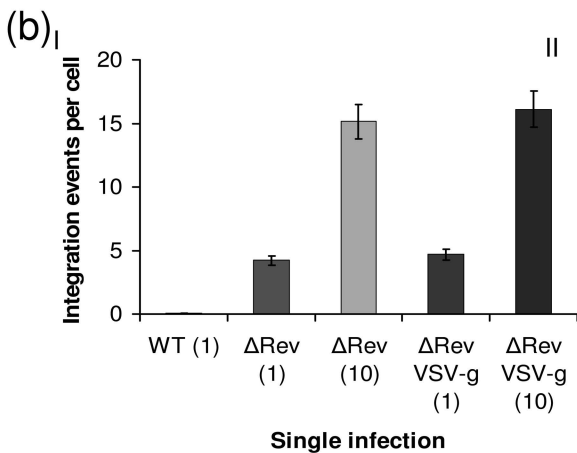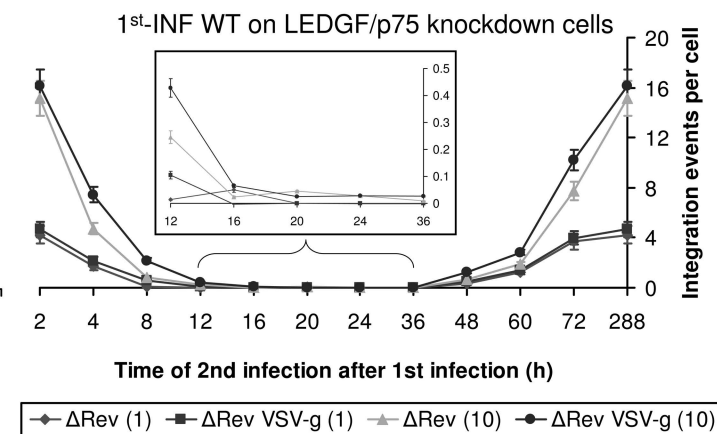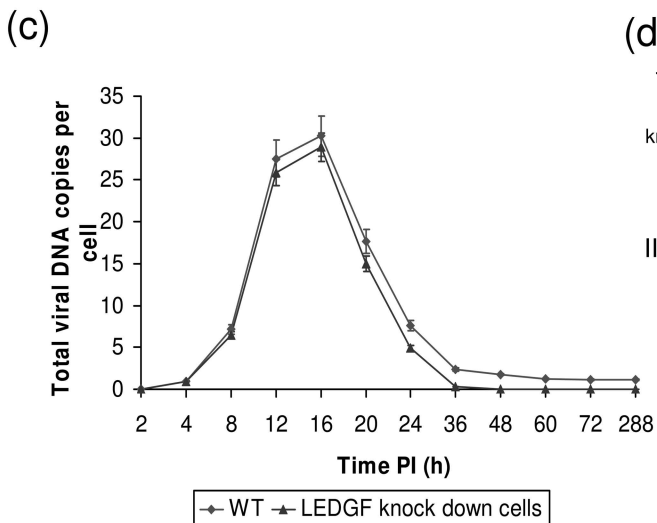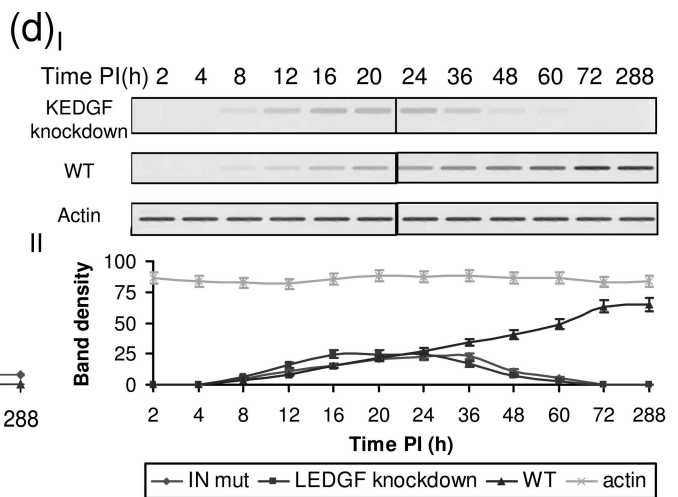

I

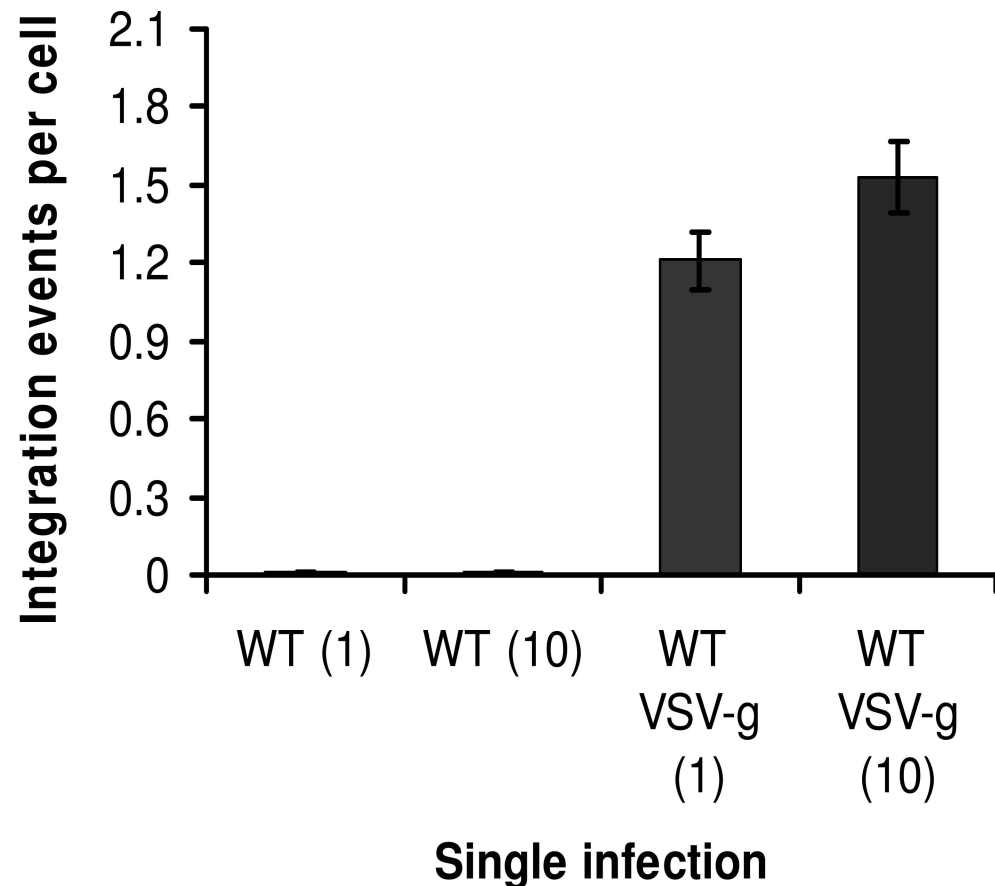

II

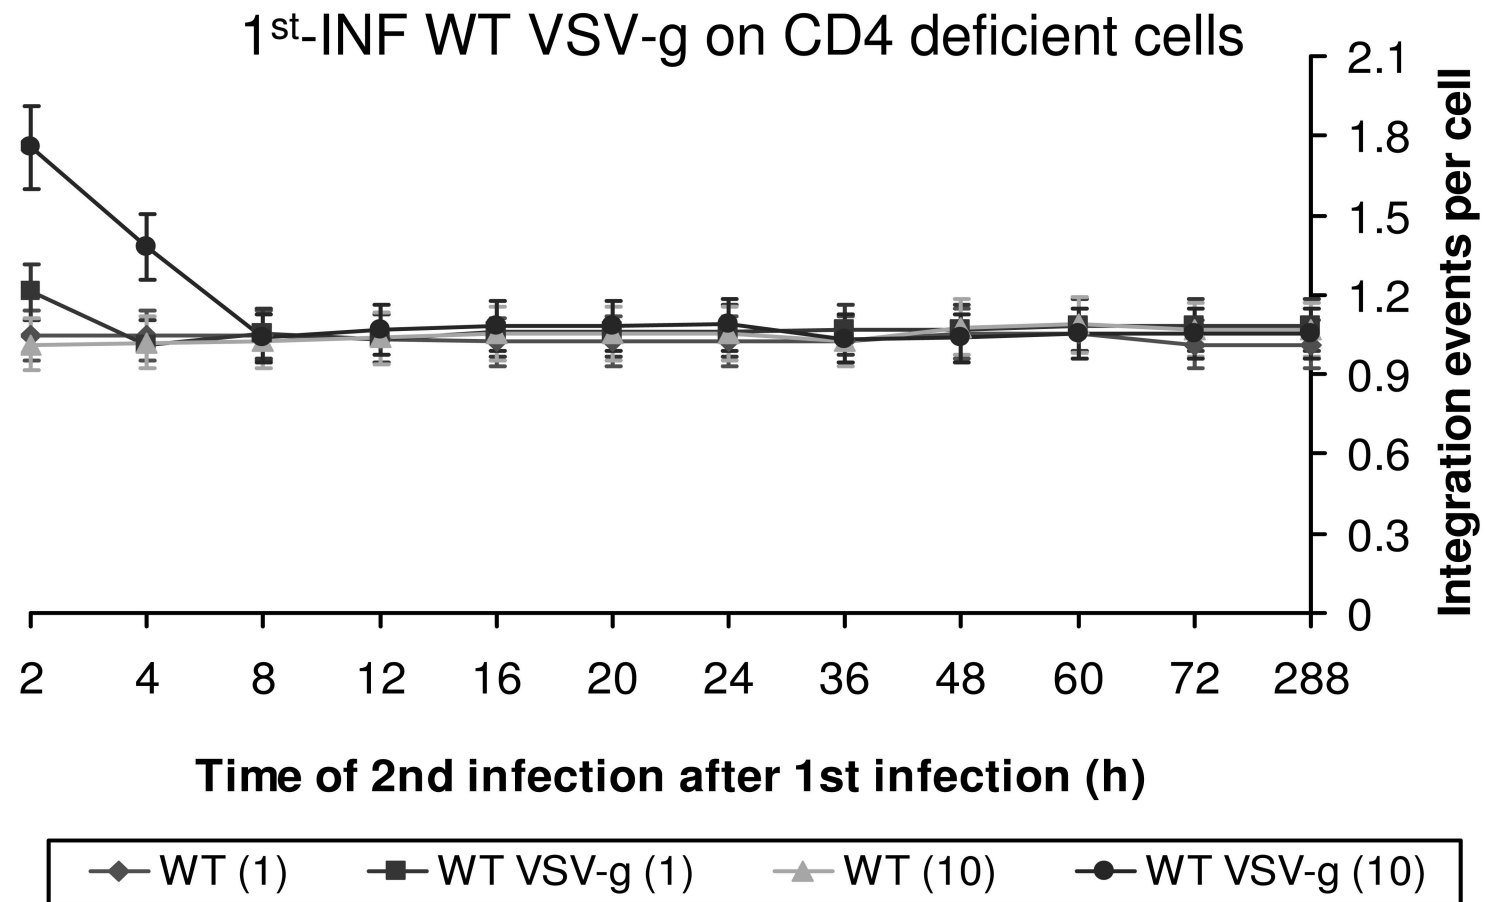

(a)<sub>I</sub>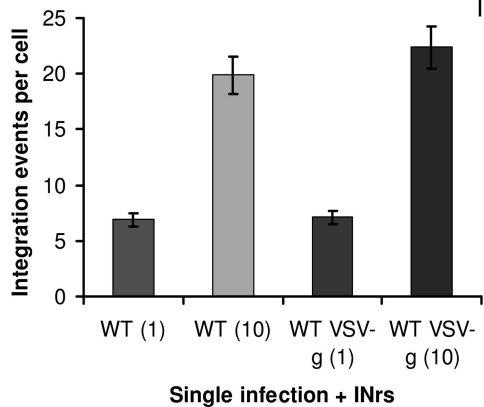

II

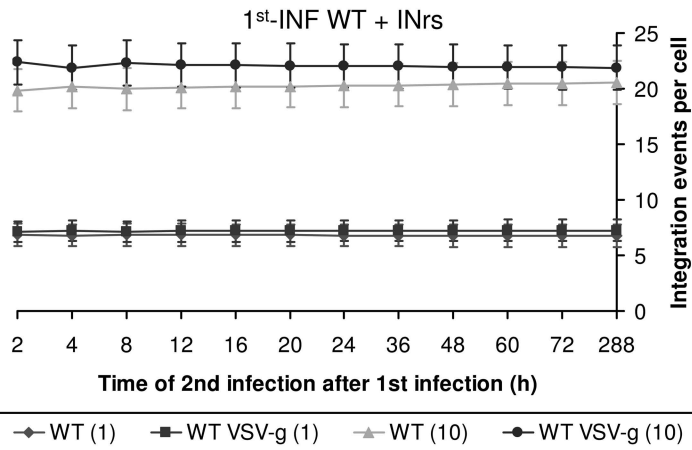

(b)

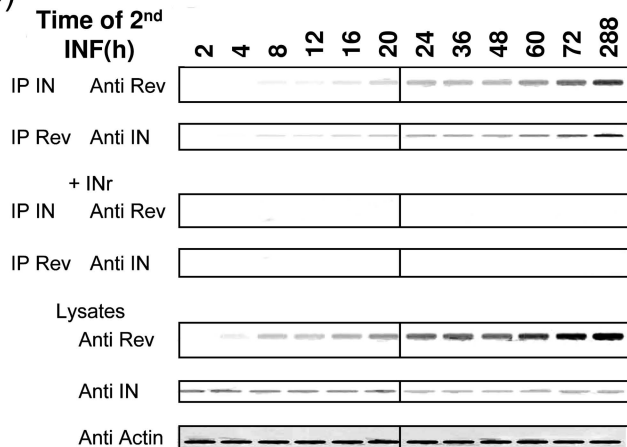

(a)

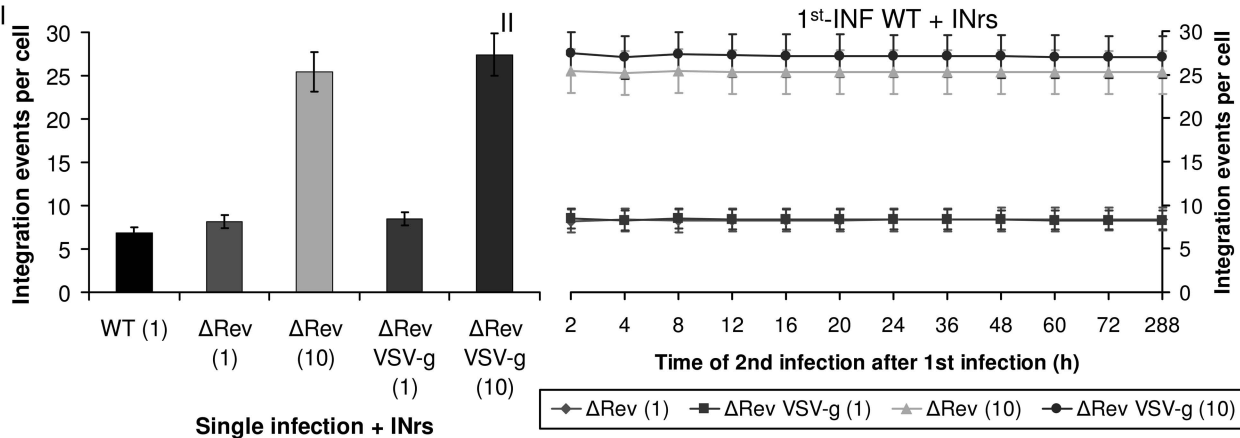

(b)

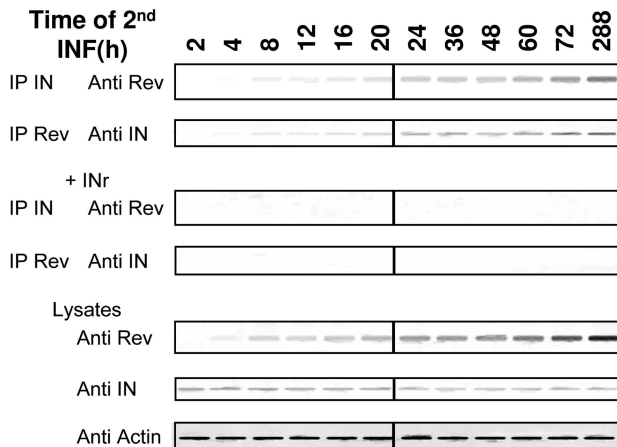

Supplement: jgv-91-1503-s001.pdf [file jgv-91-1503-s001.pdf]
